# Supplementary material for: Generation of Distal Airway Epithelium from Multipotent Human Foregut Stem Cells
Source: PubMed Central journal article supplement (PMC4499787; doi:10.1089/scd.2014.0512), 2015-03-10
Supplement: Supp_Table1.pdf [file Supp_Table1.pdf]

SUPPLEMENTARY TABLE S1. LIST OF PRIMARY ANTIBODIES

| <i>Epitope</i> | <i>Supplier</i> | <i>Catalogue number</i> |
|----------------|-----------------|-------------------------|
| NKX2.1         | AbCam           | Ab76013                 |
| NKX2.1         | AbCam           | Ab72876                 |
| NKX2.1         | SantaCruz       | SC13040                 |
| FOXP2          | R&D             | AF5647                  |
| HOECHST        | SIGMA           | B2883                   |
| Pro-SFTPC      | AbCam           | Ab40879                 |
| Cytokeratin 18 | Santa Cruz      | SC6259                  |
| CFTR           | Santa Cruz      | SC10747                 |
| CD26           | AbCam           | Ab3154                  |
| E-Cadherin     | Millipore       | CC43                    |
| GATA6          | R&D             | AF1700                  |
| MUC1           | AbCam           | Ab15481                 |
| NANOG          | R&D             | AF1997                  |
| POU5f1         | Santa Cruz      | SC8628x                 |
| TRA-1-60       | Santa Cruz      | SC21705                 |
| SOX2           | R&D             | AF2018                  |
| ZO1            | AbCam           | Ab59720                 |
